# Supplementary material for: Machine Learning and Machine Vision Accelerate 3D Printed Orodispersible Film Development
Source: MDPI journal article supplement (doi:10.3390/pharmaceutics13122187), 2021-12-17
Supplement: s1 [file s1]

# Supplementary Materials: Combining Machine Learning and Machine Vision to Accelerate 3D Printed Drug-Loaded Orodispersible Films

Colm S. O'Reilly, Moe Elbadawi, Neel Desai, Simon Gaisford, Abdul W. Basit and Mine Orlu

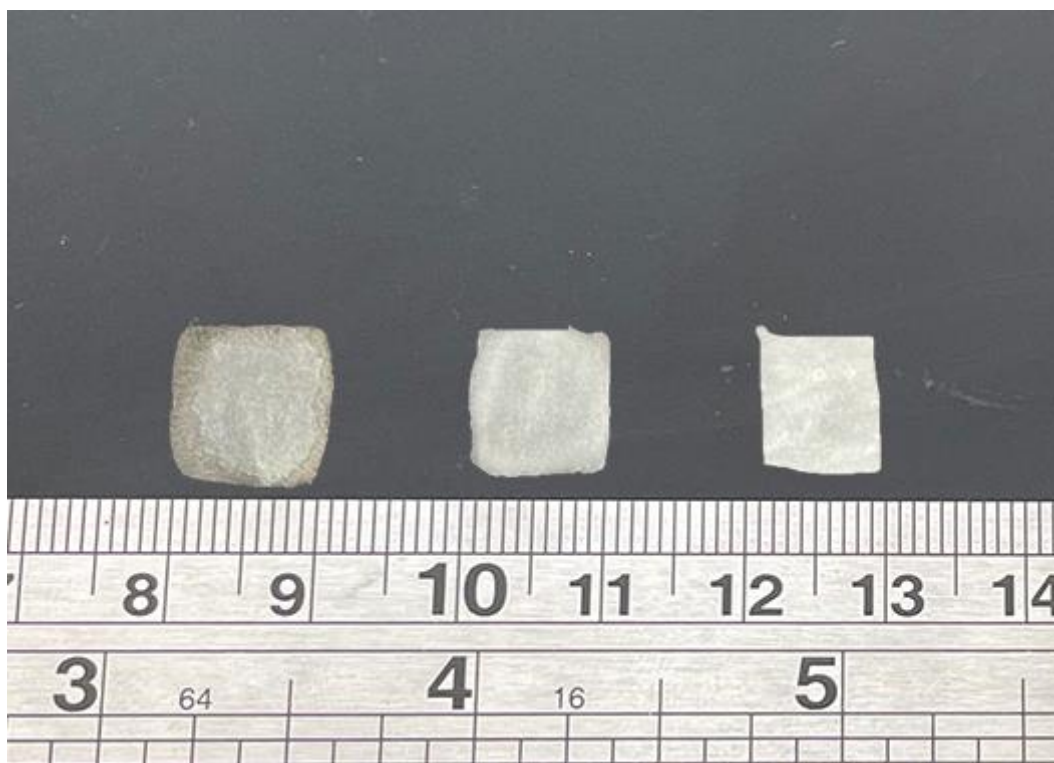

**Figure S1.** Representative low, medium and high-concentration drug-loaded film.

**Table S1.** API concentration as determined by HPLC.

| Sample       |        | API Concentration (w/w%) |
|--------------|--------|--------------------------|
| Paracetamol  | Low    | 2.05                     |
|              | Medium | 8.29                     |
|              | High   | 18.51                    |
| Caffeine     | Low    | 4.65                     |
|              | Medium | 7.28                     |
|              | High   | 15.61                    |
| Theophylline | Low    | 3.29                     |
|              | Medium | 6.46                     |
|              | High   | 14.72                    |
